# Supplementary material for: Biofilm formation displays intrinsic offensive and defensive features of Bacillus cereus
Source: PubMed Central journal article supplement (PMC6962202; doi:10.1038/s41522-019-0112-7), 2020-01-15
Supplement: 41522_2019_112_MOESM1_ESM.pdf [file 41522_2019_112_MOESM1_ESM.pdf]

# **Biofilm formation displays intrinsic offensive and defensive features of *Bacillus cereus***

Caro-Astorga Joaquin<sup>1</sup>, Frenzel Elrike<sup>2</sup>, Perkins James R<sup>3</sup>, Álvarez-Mena Ana<sup>1</sup>, de Vicente Antonio<sup>1</sup>, Ranea Juan A.G.<sup>4</sup>, Kuipers Oscar P.<sup>2</sup>, and Romero Diego<sup>1\*</sup>

## **Supplementary information**

### **Supplementary Figures**

### **Supplementary Tables**

### **Supplementary data 1. Manual annotated results.xls**

### **Supplementary movies:**

**Supplementary movie\_1-Biofilm + HeLa Conc 4 - Well F3.avi**

**Supplementary movie\_2-Planktonic +HeLa Conc 4 - Well F9.avi**

**Supplementary movie\_3-Biofilm +MDA Conc 2 - Well B2 timelapse.avi**

**Supplementary movie\_4-Planktonic +MDA Conc 2 - Well B8.avi**

# Supplementary Figure 1

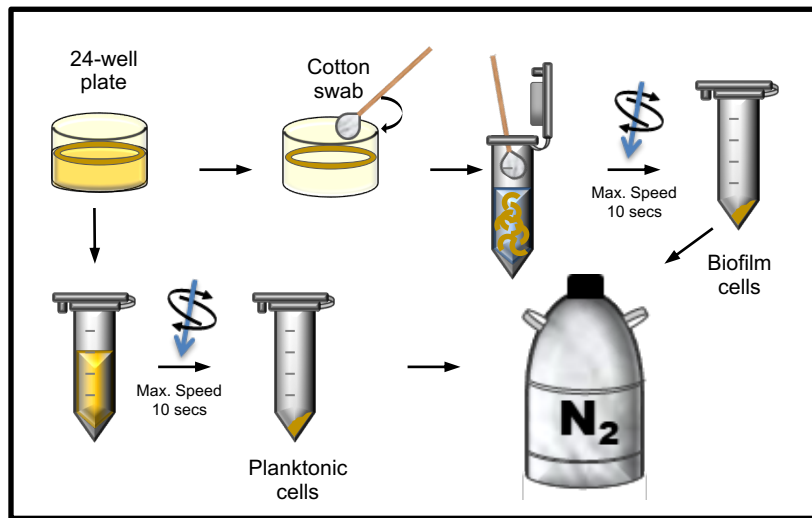

**Supplementary Figure 1. Isolation method of biofilm and floating cells.** Biofilms were grown in 24-well plates without agitation at 28°C. Floating cells were harvested taking only 250-500  $\mu$ l of the upper part of the medium without disturbing the submerged biofilm. Samples were immediately centrifuged at maximum speed for 10 seconds and frozen in liquid nitrogen after discarding the supernatant. Next, the remaining medium and submerged biofilm was discarded, and the biofilm was collected with sterile cotton swabs, suspended in 1 ml of TY medium, centrifuged at maximum speed for 10 seconds and frozen in liquid nitrogen after discarding the supernatant. The sampling time was less than one minute to prevent RNA degradation and RNA recycling.

## Supplementary Figure 2

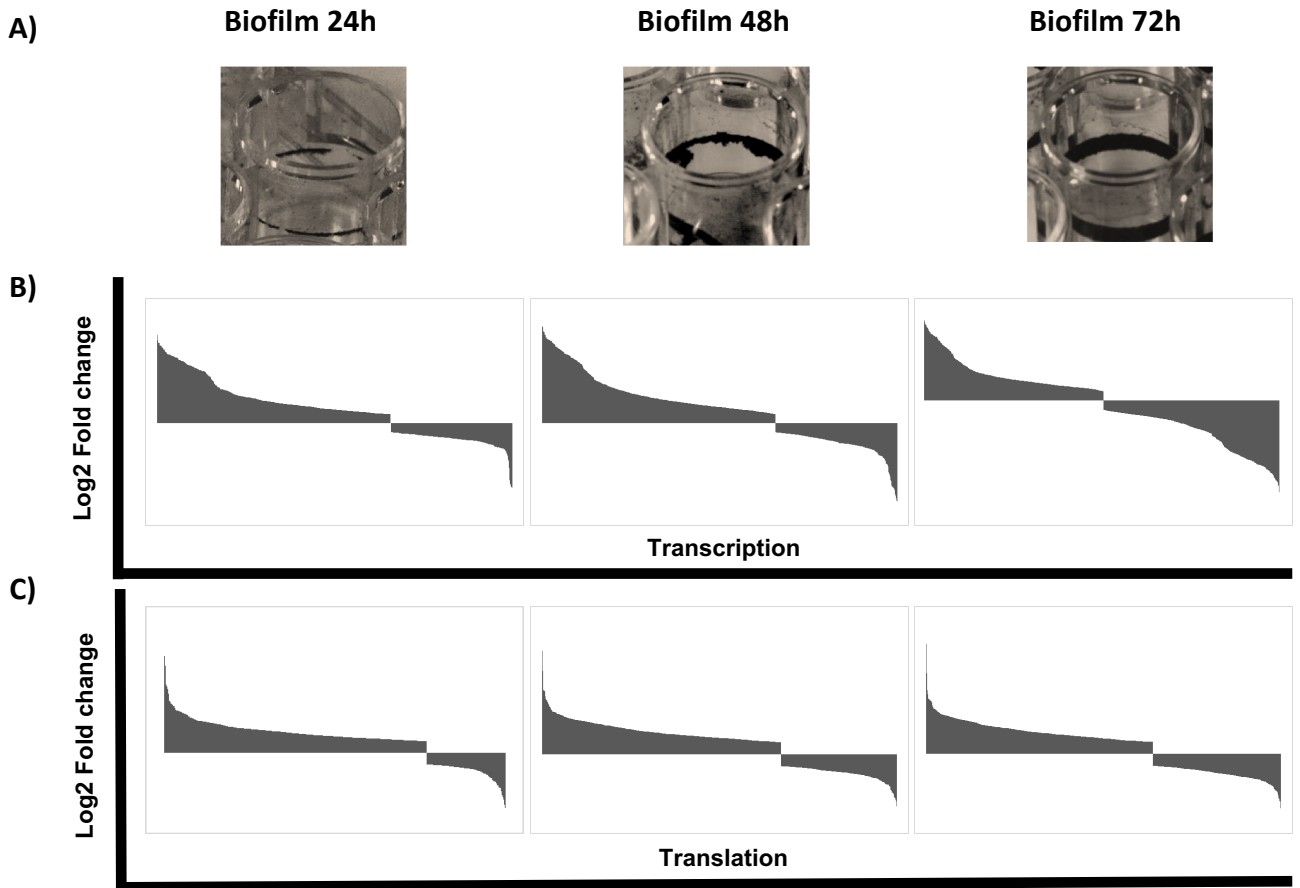

**Supplementary Figure 2.** A) Pictures of biofilm of *B. cereus* at 24, 48 and 72 h, stained with crystal violet and washed several time in water. B) Graph Log<sub>2</sub> Fold Change of genes transcription levels at 24, 48 and 72 h. Statistically significant changes are shown (Log<sub>2</sub> > 2 and p-value < 0.05). C) Graph Log<sub>2</sub> (Fold Change) of protein levels at 24, 48 and 72 h. Statistically significant changes are shown (Log<sub>2</sub> > 0.7 and q-value < 0.05).

# Supplementary Figure 3

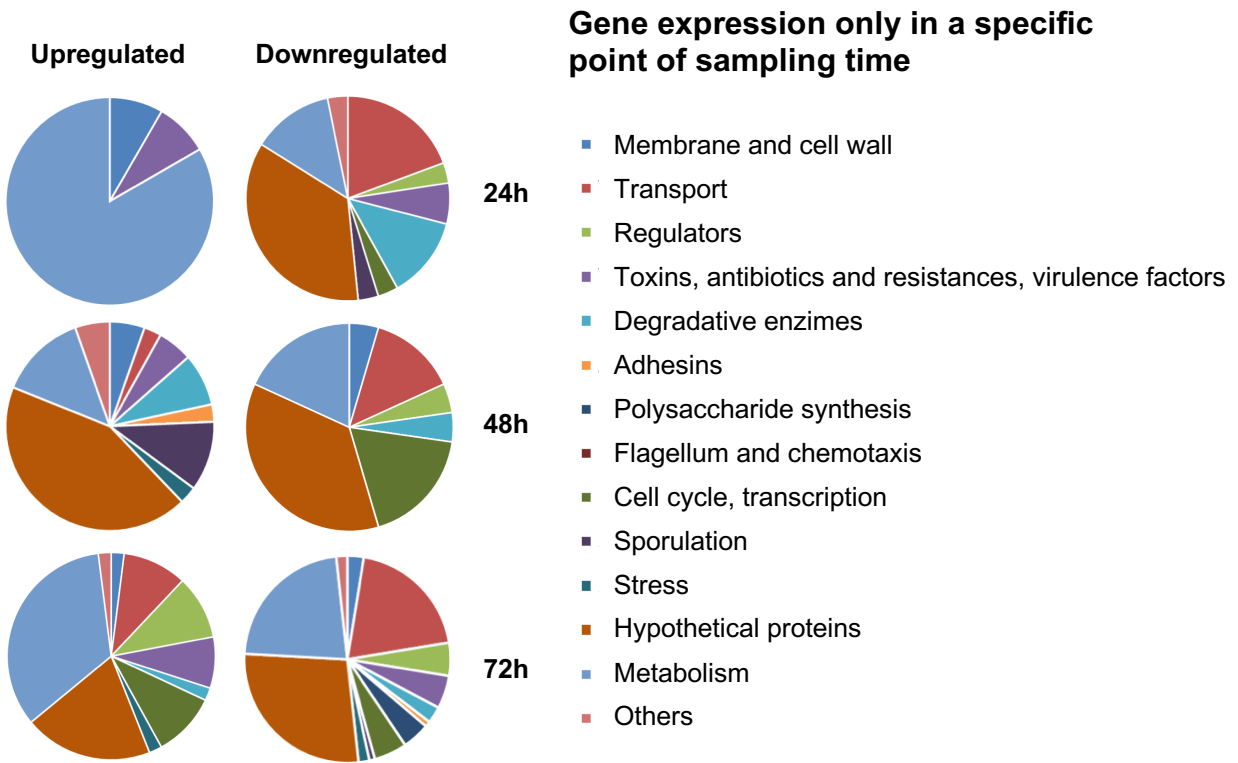

**Supplementary Figure 3.** Circle charts of genes with statistically significant changes in their expression pattern ( $\text{Log}_2(\text{Fold change}) > |2|$ ) at 24, 48 or 72 h but not at other time points. Specific stage genes increase their diversity especially at 48 and 72 h biofilms.

# Supplementary Figure 4

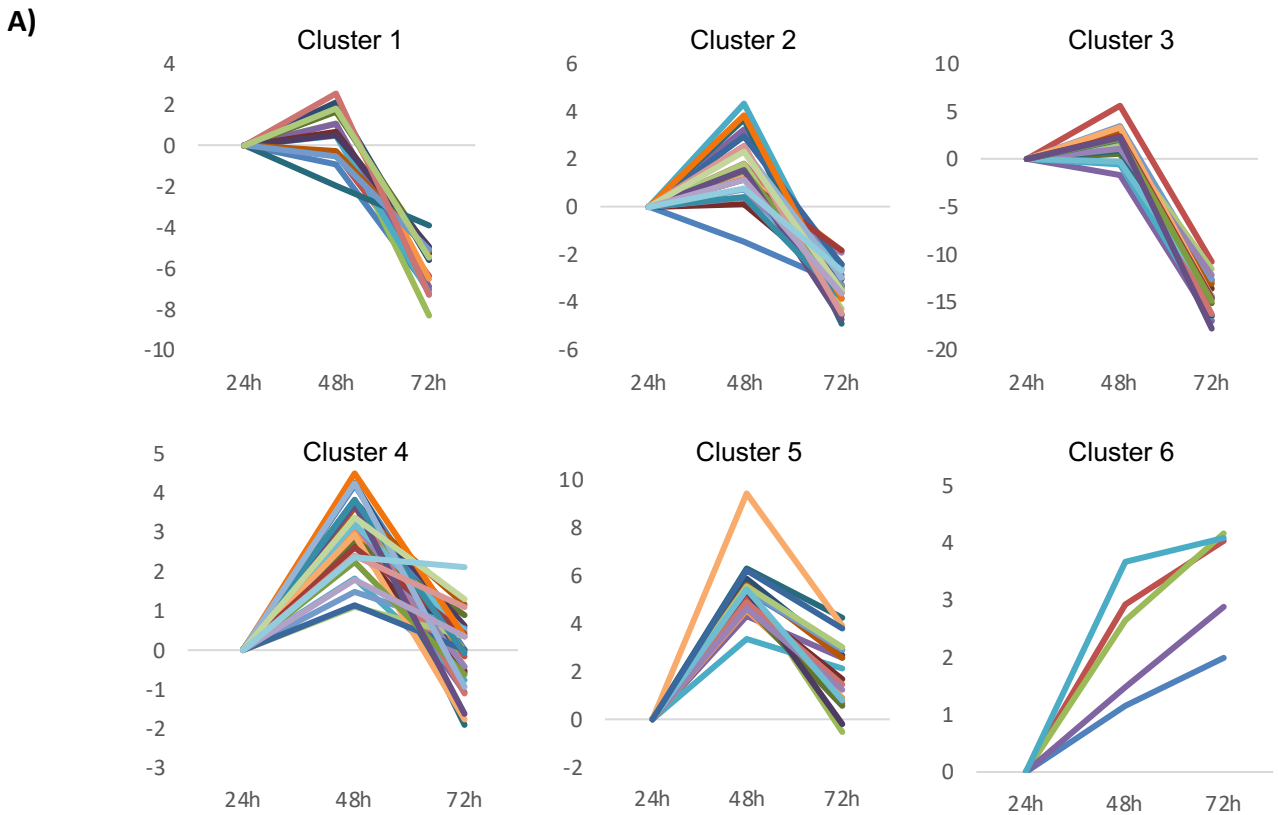

**B) Cluster 6**

| Gene ID | 24h   | 48h  | 72h  | Gen name                                     |
|---------|-------|------|------|----------------------------------------------|
| BC2353  | 1.47  | 2.61 | 3.46 | Spo0A-P phosphatase                          |
| BC2142  | -0.32 | 2.59 | 3.71 | stage V sporulation protein S                |
| BC1340  | -0.45 | 2.19 | 3.71 | Sporulation kinase KinE                      |
| BC2259  | 3.21  | 3.81 | 3.80 | Sporulation-control protein Spo0M            |
| BC5482  | -3.31 | 0.36 | 0.77 | Sporulation initiation inhibitor protein soj |

**Supplementary Figure 4.** A) Clustering of sporulation genes with STEM. Clusters 1-5 show sharp downregulation of most of sporulation genes. Cluster 6 contain five genes with an expression pattern of higher expression at 72 h than in previous strages. B) List of genes included in cluster 6 showing that three out of five genes are involved in negative regulation of sporulation and one gene involved in the last stage of spore maturation, proposed to play a role in the coat assembly. KinE, has been demonstrated low phosphorylation activity to the sporulation phosphorelay (Fujita and Losick, 2005).

# Supplementary Figure 5

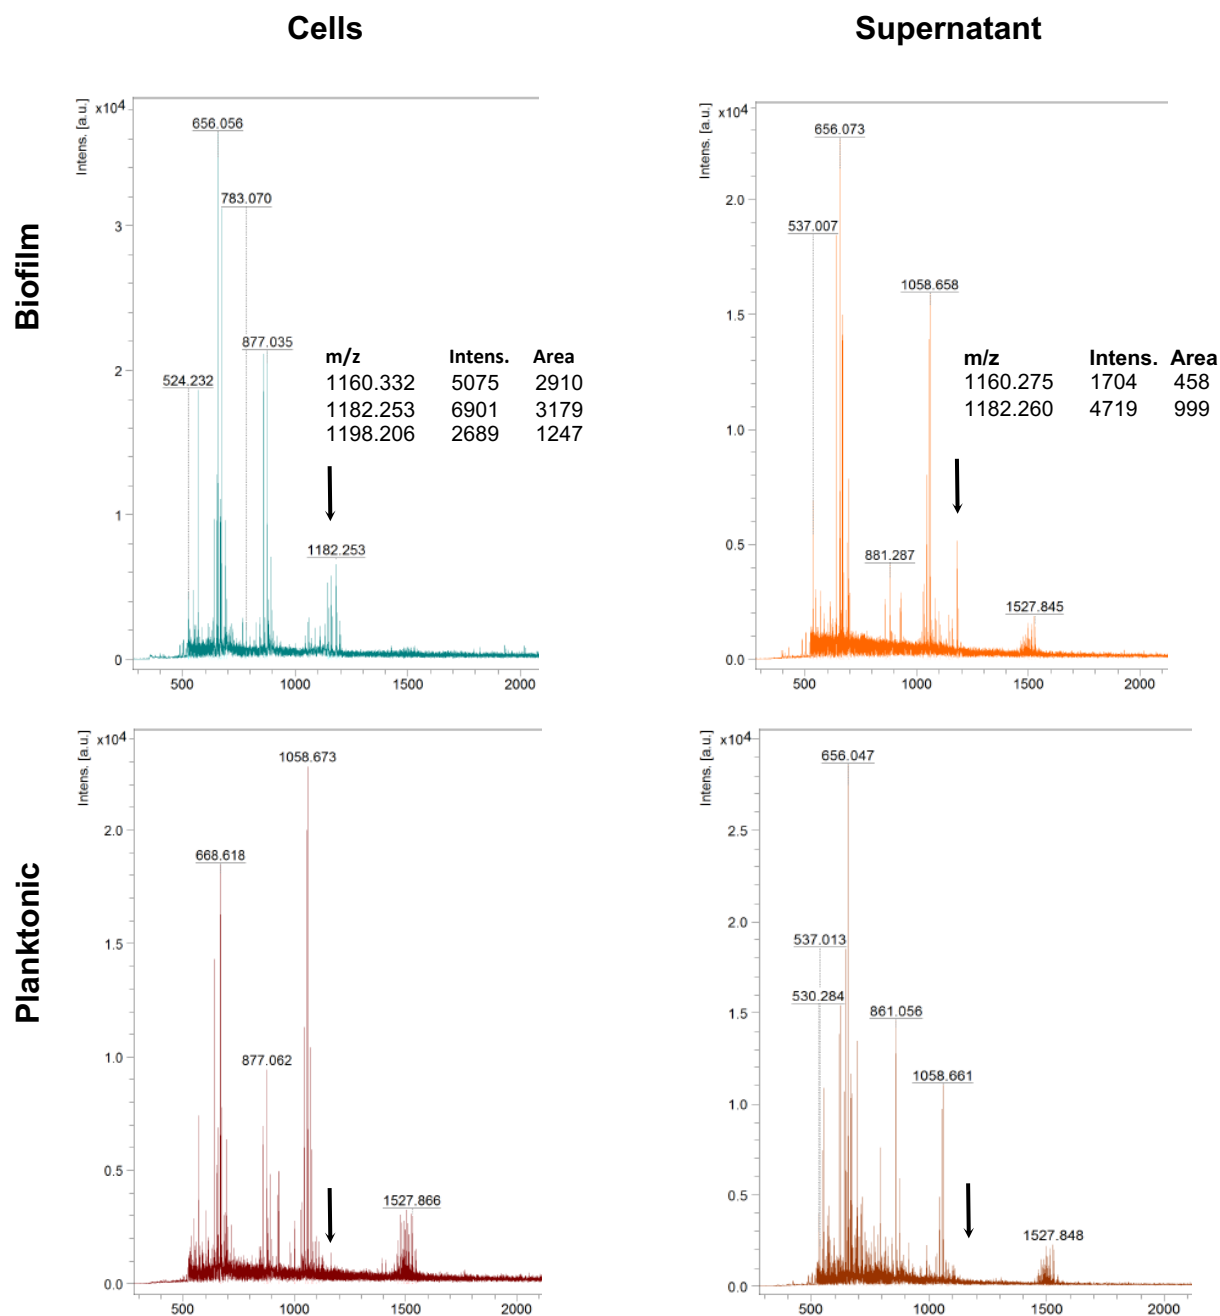

**Supplementary Figure 5.** Complete spectrums from Mass-spectrometry HPLC-MS-MS (ToF-Tof) of cells and supernatants of 48 h cultures. Biofilm was collected and suspended in PBS, separating cells from supernatant with centrifugation. Culture medium was centrifuged to separate floating cells from supernatant. Samples were purified with C8 ZipTip® (Merk) previous to MS analysis. Tables resume the m/z found corresponding to Thiocillin (m/z=1160) and sodium (m/z=1182) and potassium adducts (m/z=1198). Black arrows indicate approximate positions of Thiocillin peaks.



# Supplementary Figure 7

## Toxicity on HeLa cells

## Toxicity on MDA cells

Floating cells

Biofilm cells

$1 \cdot 10^{-8}$  Ucf/ ml

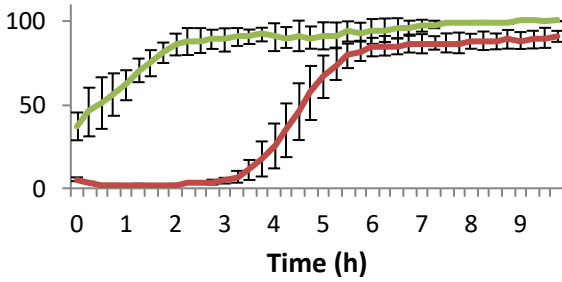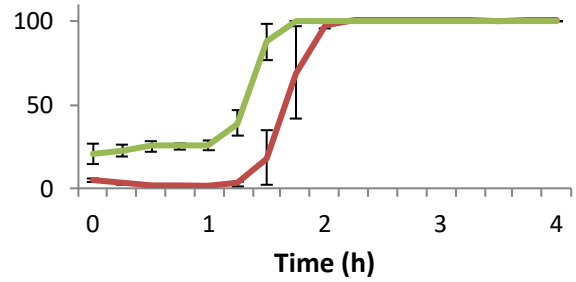

$8 \cdot 10^{-7}$  Ucf/ ml

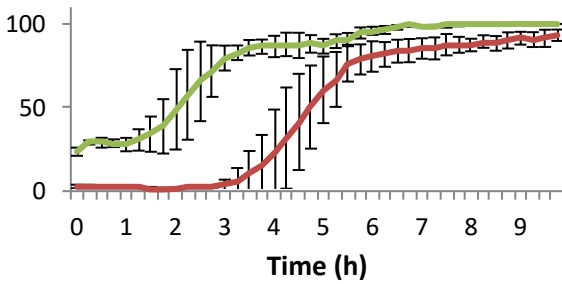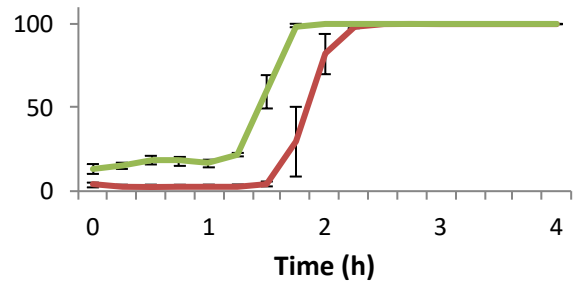

$6 \cdot 10^{-7}$  Ucf/ ml

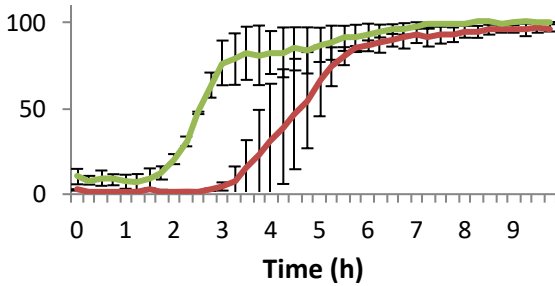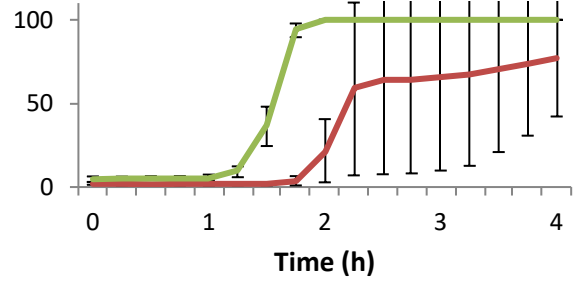

$4 \cdot 10^{-7}$  Ucf/ ml

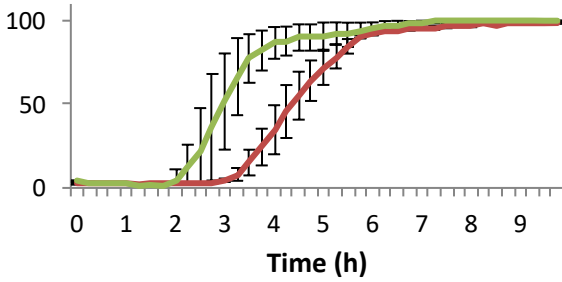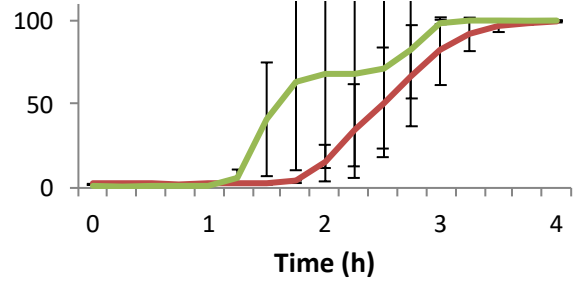

$2 \cdot 10^{-7}$  Ucf/ ml

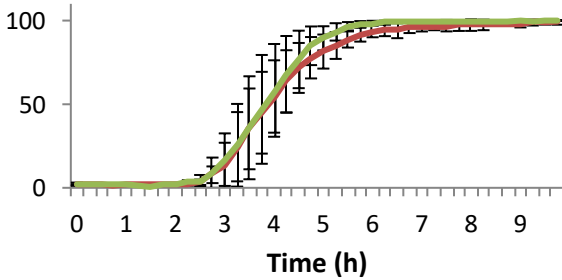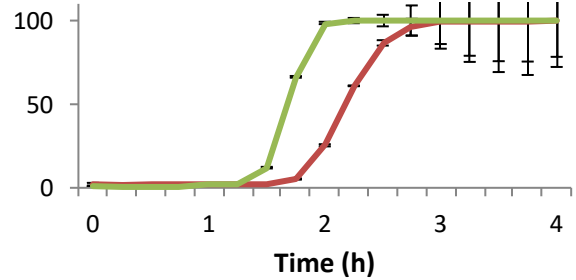

Dead cells (%)

Bacteria concentration

**Supplementary Figure 7.** Toxicity assay of floating cells (green line) or biofilm (red line) cells of 48 h bacterial cultures against HeLa and MDA cell lines cultures without antibiotics. Error bars indicate SD (n=12). Bacteria samples were washed in PBS twice and the OD600 was adjusted to 1 ( $\sim 10^7$  ucf/ml). From this suspension, serial dilutions were done previous to inoculation.



# Supplementary Figure 8

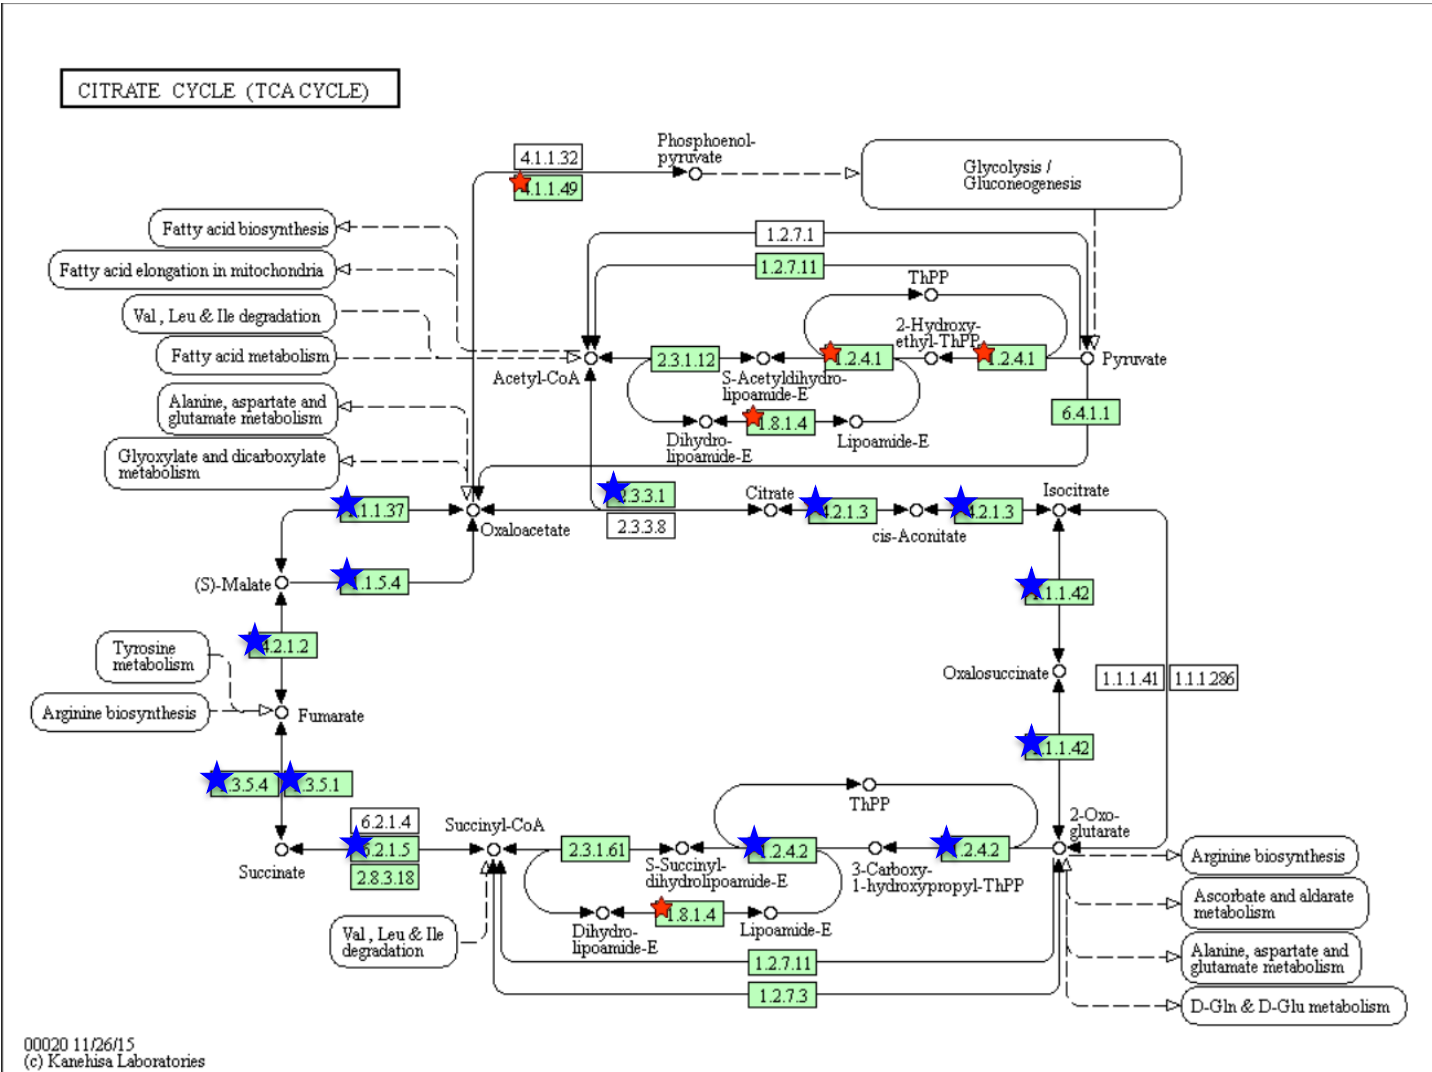

**Supplementary Figure 8.** Canonic pathway of Tricarboxylic Acid Cycle (TCA) (KEGG Database). Squares indicate enzymatic processes. Green squares indicate process able to be accomplished by *B. cereus*. Stars indicate enhanced expression in planktonic cells (blue) or biofilm cells (red).

# Supplementary Figure 9

## 2-OXOCARBOXYLIC ACID METABOLISM

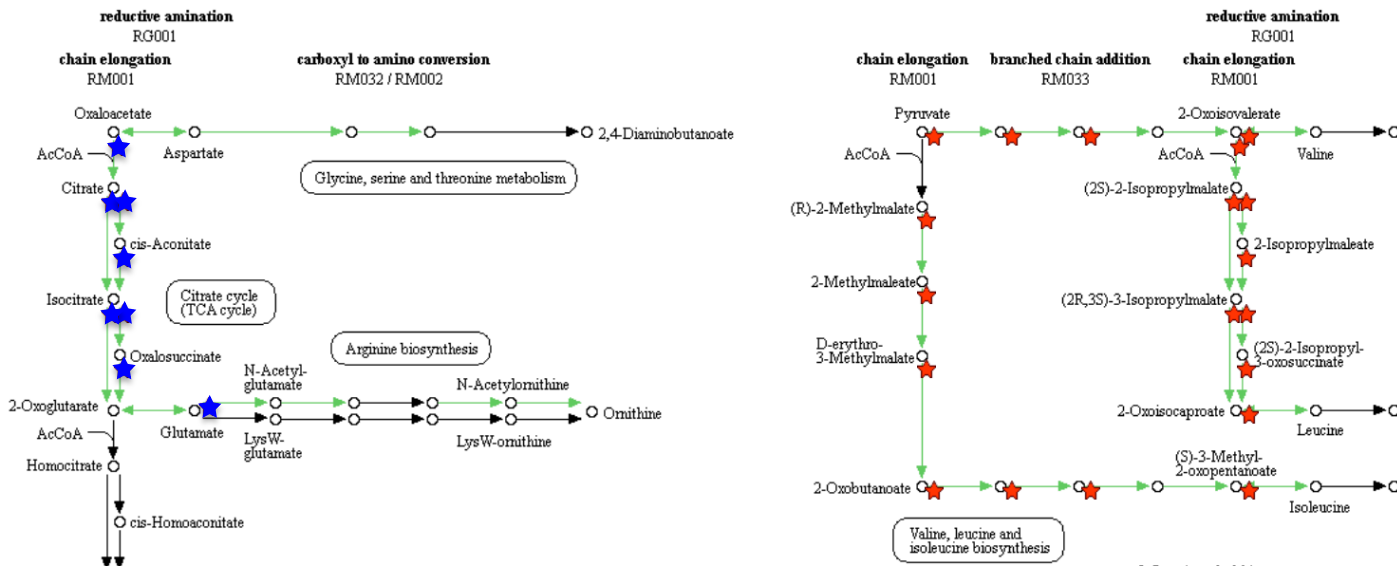

**Supplementary Figure 9.** Canonic scheme of the 2-Oxocarboxylic Acid metabolism (KEGG Database). Arrows indicate enzymatic processes. Green arrows indicate process able to be accomplished by *B. cereus*. Stars indicate enhanced expression in planktonic cells (blue) or biofilm cells (red).

# Supplementary Figure 10

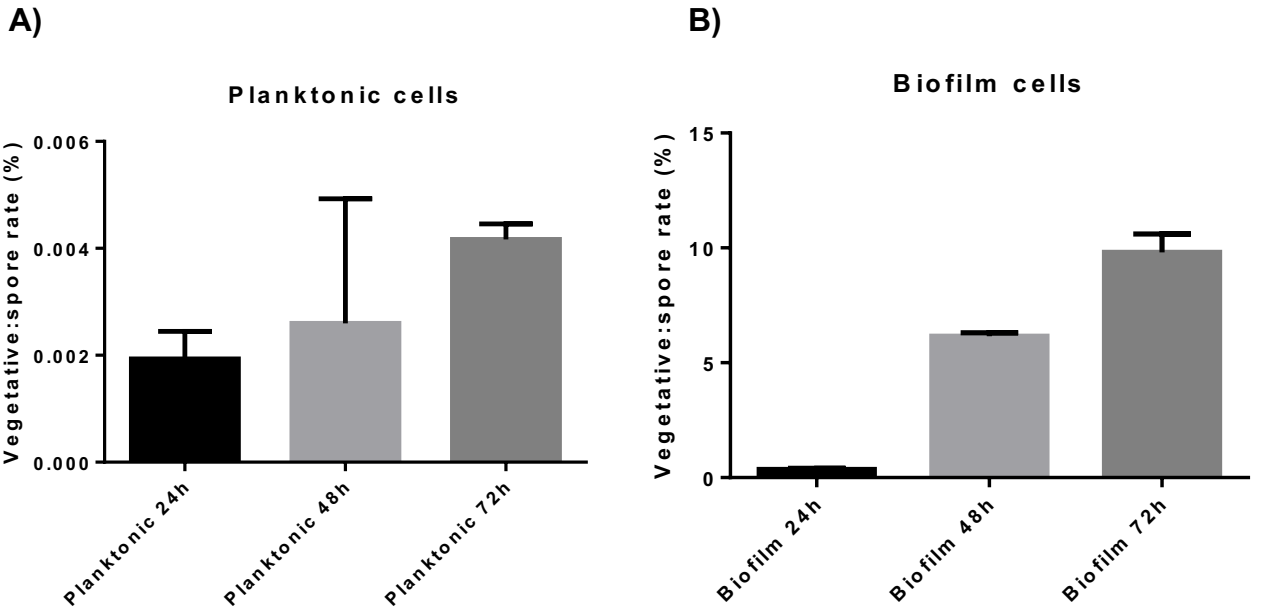

**Supplementary Figure 10.** Percentage of sporulation in planktonic (floating) or biofilm associated cells at different time points. Values are the mean of three replicates and standard deviation.

## Supplementary Tables

**Supplementary Table 1.** Expression pattern of genes involved in amino acid transport. Asterisk indicates confirmed behaviour at protein levels.

| Gene ID | Log2<br>(fold<br>change) |       |        | Gene name                                       | iTRAQ |
|---------|--------------------------|-------|--------|-------------------------------------------------|-------|
|         | 24 h                     | 48 h  | 72 h   |                                                 |       |
| BC0401  | 1.38                     | 4.05  | 4.71   | cystine transport system permease               | *     |
| BC0402  | 2.46                     | 4.30  | 5.42   | cystine-binding protein                         | *     |
| BC0403  | 1.24                     | 4.12  | 4.70   | glutamine transport ATP-binding protein glnQ    | *     |
| BC0638  | 1.44                     | 4.50  | 5.10   | Sodium/proton-dependent alanine carrier protein | *     |
| BC0639  | 8.70                     | 8.82  | 1.78   | glutamine transport ATP-binding protein glnQ    |       |
| BC0640  | 15.73                    | 17.36 | 7.72   | glutamine-binding protein                       | *     |
| BC0703  | 1.23                     | 3.41  | 3.47   | Sodium/proline symporter                        |       |
| BC0865  | 0.02                     | -0.51 | -3.69  | arginine/ornithine antiporter                   |       |
| BC1231  | -3.21                    | -1.45 | -0.07  | Sodium/proline symporter                        |       |
| BC1432  | -1.59                    | -1.90 | -3.18  | proton/sodium-glutamate symport protein         | *     |
| BC1609  | 1.55                     | 4.17  | 5.94   | Sodium/proline symporter                        | *     |
| BC1927  | 2.11                     | 5.79  | 6.66   | leu-, iso-, val-, trn-, ala-binding protein     | *     |
| BC2790  | 5.31                     | 7.63  | 5.29   | glycine betaine transport system permease       |       |
| BC2980  | -0.14                    | -0.53 | -4.31  | arginine permease                               |       |
| BC3398  | 0.01                     | -2.47 | -5.75  | Serine transporter                              | *     |
| BC4071  | 2.82                     | 5.62  | 6.82   | Sodium/proline symporter                        | *     |
| BC4149  | -2.26                    | -3.48 | -1.42  | arginine ABC transporter permease               | *     |
| BC4150  | -2.13                    | -2.90 | -0.30  | arginine-binding protein                        | *     |
| BC4242  | 1.12                     | 2.20  | 4.00   | proton/sodium-glutamate symport protein         |       |
| BC5043  | -1.63                    | -3.20 | -4.10  | Sodium/proton-dependent alanine carrier protein |       |
| BC5051  | -3.53                    | -1.60 | -3.76  | Sodium/proton-dependent alanine carrier protein |       |
| BC5218  | -0.03                    | -3.89 | -16.49 | proton/sodium-glutamate symport protein         |       |

**Supplementary Table 2.** Expression pattern of genes involved in antimicrobial biosynthesis. Asterisk indicates confirmed behaviour at protein levels.

| Gene ID | Log2 (fold change) |       |        | Molecule            | iTRAQ |
|---------|--------------------|-------|--------|---------------------|-------|
|         | 24 h               | 48 h  | 72 h   |                     |       |
| BC1201  | 2.87               | 5.63  | 1.75   | Tylosin             |       |
| BC1204  | 8.07               | 9.53  | 5.09   | Tylosin             |       |
| BC1206  | 7.01               | 8.13  | 2.73   | Tylosin             | *     |
| BC1208  | 5.00               | 6.74  | 1.04   | Streptomycin like   |       |
| BC1209  | 5.95               | 7.91  | 2.46   | Streptomycin like   | *     |
| BC1210  | 3.47               | 4.24  | -0.52  | Streptomycin like   |       |
| BC1211  | 3.78               | 6.19  | 2.59   | Streptomycin like   |       |
| BC1212  | 4.36               | 6.94  | 0.28   | Streptomycin like   | *     |
| BC1213  | 3.38               | 5.85  | -1.63  | Streptomycin like   |       |
| BC1214  | 3.10               | 5.17  | 0.92   | Streptomycin like   | *     |
| BC1248  | 3.77               | 5.88  | 2.80   | Bacteriocin         |       |
| BC1249  | 4.28               | 5.43  | 3.24   | Bacteriocin         |       |
| BC1250  | 4.31               | 5.00  | 1.78   | Bacteriocin         |       |
| BC2452  | 0.24               | 3.00  | 4.99   | Bacitracin          |       |
| BC2966  | 16.71              | 17.72 | 10.24  | Polyketide synthase |       |
| BC5079  | -1.90              | 3.60  | 4.62   | Thiocillin          | *     |
| BC5080  | -1.58              | 3.00  | 3.75   | Thiocillin          | *     |
| BC5081  | -0.86              | 3.27  | 4.33   | Thiocillin          | *     |
| BC5082  | -2.43              | 3.20  | 4.32   | Thiocillin          | *     |
| BC5083  | -2.33              | 2.06  | 3.34   | Thiocillin          | *     |
| BC5084  | -1.76              | 2.48  | 3.69   | Thiocillin          | *     |
| BC5085  | -0.77              | 3.52  | 3.36   | Thiocillin          | *     |
| BC5086  | -1.76              | 2.83  | 4.04   | Thiocillin          | *     |
| BC5087  | 2.85               | 3.61  | 3.02   | Thiocillin          |       |
| BC5088  | 2.81               | 3.74  | 3.14   | Thiocillin          |       |
| BC5089  | 2.61               | 3.65  | 2.90   | Thiocillin          |       |
| BC5090  | 2.61               | 2.87  | 3.13   | Thiocillin          |       |
| BC3021  | 0.48               | 2.21  | 2.78   | Colicin             | *     |
| BC1426  | 2.01               | 8.10  | 8.50   | Porphirin           |       |
| BC1427  | 1.46               | 5.19  | 4.77   | Porphirin           |       |
| BC1428  | 3.04               | 6.66  | 6.96   | Porphirin           | *     |
| BC2133  | -2.57              | -4.22 | -11.87 | Porphirin           |       |
| BC2134  | -2.99              | -4.05 | -6.25  | Porphirin           |       |
| BC4468  | 2.84               | 3.27  | 3.62   | Porphirin           |       |

**Supplementary Table 3.** Specialization of biofilm and floating cells in distinct but coordinated metabolic activities. Genes belonging to cluster 1.

| <b>GeneIDs</b> | <b>Planktonic(blue)/Biofilm(red)</b> | <b>DAVID Functional annotation</b>                                                                         |
|----------------|--------------------------------------|------------------------------------------------------------------------------------------------------------|
| BC0344         | blue                                 | 1-pyrroline-5-carboxylate dehydrogenase                                                                    |
| BC0410         | blue                                 | Crp family transcriptional regulator                                                                       |
| BC0411         | blue                                 | hypothetical protein                                                                                       |
| BC0466         | blue                                 | fumarate hydratase                                                                                         |
| BC0491         | blue                                 | formate acetyltransferase                                                                                  |
| BC0492         | blue                                 | pyruvate formate-lyase activating enzyme                                                                   |
| BC0589         | blue                                 | formate dehydrogenase alpha chain                                                                          |
| BC0590         | blue                                 | hypothetical protein                                                                                       |
| BC0611         | blue                                 | aspartate ammonia-lyase                                                                                    |
| BC0612         | blue                                 | L-lactate permease                                                                                         |
| BC0621         | blue                                 | 2-amino-3-ketobutyrate CoA ligase                                                                          |
| BC0849         | blue                                 | acetyltransferase                                                                                          |
| BC0898         | blue                                 | enoyl-CoA hydratase                                                                                        |
| BC1149         | blue                                 | ornithine--oxo-acid transaminase                                                                           |
| BC1231         | blue                                 | sodium/proline symporter                                                                                   |
| BC1252         | blue                                 | 2-oxoglutarate dehydrogenase subunit E1                                                                    |
| BC1746         | blue                                 | asparagine synthetase AsnA                                                                                 |
| BC2220         | blue                                 | alcohol dehydrogenase                                                                                      |
| BC2758         | blue                                 | metal-dependent hydrolase                                                                                  |
| BC2896         | blue                                 | aspartate aminotransferase                                                                                 |
| BC2959         | blue                                 | malate:quinone oxidoreductase                                                                              |
| BC3616         | blue                                 | aconitate hydratase                                                                                        |
| BC3650         | blue                                 | imidazolonepropionase                                                                                      |
| BC3651         | blue                                 | urocanate hydratase                                                                                        |
| BC3652         | blue                                 | histidine ammonia-lyase                                                                                    |
| BC3653         | blue                                 | anti-terminator HutP                                                                                       |
| BC3833         | blue                                 | succinyl-CoA synthetase subunit alpha                                                                      |
| BC3834         | blue                                 | succinyl-CoA synthetase subunit beta                                                                       |
| BC4023         | blue                                 | acetyl-CoA acetyltransferase                                                                               |
| BC4224         | blue                                 | glycine dehydrogenase subunit 2                                                                            |
| BC4225         | blue                                 | glycine dehydrogenase subunit 1                                                                            |
| BC4226         | blue                                 | glycine cleavage system aminomethyltransferase T<br>bifunctional acetaldehyde-CoA/alcohol<br>dehydrogenase |
| BC4365         | blue                                 | dehydrogenase                                                                                              |
| BC4516         | blue                                 | succinate dehydrogenase iron-sulfur subunit                                                                |
| BC4517         | blue                                 | succinate dehydrogenase flavoprotein subunit                                                               |
| BC4592         | blue                                 | malate dehydrogenase                                                                                       |
| BC4593         | blue                                 | isocitrate dehydrogenase                                                                                   |
| BC4594         | blue                                 | citrate synthase                                                                                           |
| BC4870         | blue                                 | L-lactate dehydrogenase                                                                                    |

|        |      |                                                 |
|--------|------|-------------------------------------------------|
| BC4995 | blue | regulatory protein                              |
| BC4996 | blue | L-lactate dehydrogenase                         |
| BC5002 | blue | acyl-CoA dehydrogenase                          |
| BC5003 | blue | acetyl-CoA acetyltransferase                    |
| BC5004 | blue | enoyl-CoA hydratase                             |
| BC5006 | blue | Prolyne dehydrogenase                           |
| BC5228 | blue | L-lactate permease                              |
| BC5342 | blue | acyl-CoA dehydrogenase                          |
| BC5344 | blue | acetyl-CoA acetyltransferase                    |
| BC5345 | blue | Iron-sulphur-binding reductase                  |
| BC5438 | blue | antiholin-like protein LrgB                     |
| BC5439 | blue | murein hydrolase regulator LrgA                 |
| BC0355 | red  | 4-aminobutyrate--2-oxoglutarate transaminase    |
| BC0356 | red  | sigma-54-dependent transcriptional activator    |
| BC0357 | red  | succinate-semialdehyde dehydrogenase [NADP+]    |
| BC1036 | red  | glycerol-3-phosphate dehydrogenase              |
| BC1301 | red  | two component system histidine kinase           |
| BC1396 | red  | branched-chain amino acid aminotransferase      |
| BC1398 | red  | acetolactate synthase small subunit             |
| BC1399 | red  | ketol-acid reductoisomerase                     |
| BC1400 | red  | 2-isopropylmalate synthase                      |
| BC1401 | red  | 3-isopropylmalate dehydrogenase                 |
| BC1402 | red  | 3-isopropylmalate dehydratase large subunit     |
| BC1610 | red  | aminotransferase                                |
| BC1611 | red  | hypothetical protein                            |
| BC1776 | red  | branched-chain amino acid aminotransferase      |
| BC1777 | red  | acetolactate synthase 3 catalytic subunit       |
| BC2285 | red  | citrate synthase 3                              |
| BC2286 | red  | 2-methylcitrate dehydratase                     |
| BC2287 | red  | methylisocitrate lyase                          |
| BC2288 | red  | acyl-CoA dehydrogenase                          |
| BC2289 | red  | 3-hydroxyisobutyrate dehydrogenase              |
| BC2290 | red  | methylmalonate-semialdehyde dehydrogenase       |
| BC2292 | red  | 3-hydroxyisobutyryl-CoA hydrolase               |
| BC2776 | red  | dihydrolipoamide dehydrogenase                  |
| BC2778 | red  | acetoin dehydrogenase E1 component beta-subunit |
| BC3555 | red  | aldehyde dehydrogenase                          |
| BC3939 | red  | formamidase                                     |
| BC4325 | red  | late competence protein ComER                   |
| BC4595 | red  | hypothetical protein                            |
| BC4644 | red  | PhnB protein                                    |
| BC4645 | red  | acetyl-coenzyme A synthetase                    |
| BC4762 | red  | phosphoenolpyruvate carboxykinase               |
| BC5133 | red  | holin-like protein                              |

**Supplementary Table 4.** KEGG pathways enrichment data for ALL, blue (planktonic), and red (biofilm) genes in cluster 1. Significance tests p-value and Benjamini are shown, and the number and percentage of gene over the total genes in Cluster 1 is also shown for each KEGG pathway.

| <b>KEGG:<br/>Metabolic<br/>pathways</b> | <b>P-Value</b> | <b>Benjamini</b> | <b>#genes</b> | <b>%genes</b> |
|-----------------------------------------|----------------|------------------|---------------|---------------|
| ALL                                     | 8.00E-10       | 6.80E-09         | 52            | 62.7          |
| BLUE<br>(Planktonic)                    | 3.50E-07       | 2.10E-06         | 34            | 66.7          |
| RED (Biofilm)                           | 1.70E-03       | 6.10E-03         | 18            | 56.2          |

| <b>KEGG:<br/>Biosynthesis of<br/>antibiotics</b> | <b>P-Value</b> | <b>Benjamini</b> | <b>#genes</b> | <b>%genes</b> |
|--------------------------------------------------|----------------|------------------|---------------|---------------|
| ALL                                              | 5.80E-14       | 2.90E-12         | 35            | 42.2          |
| BLUE<br>(Planktonic)                             | 1.60E-10       | 6.60E-09         | 24            | 47.1          |
| RED (Biofilm)                                    | 5.00E-04       | 2.30E-03         | 11            | 34.4          |

| <b>KEGG:<br/>Biosynthesis of<br/>secondary<br/>metabolites</b> | <b>P-Value</b> | <b>Benjamini</b> | <b>#genes</b> | <b>%genes</b> |
|----------------------------------------------------------------|----------------|------------------|---------------|---------------|
| ALL                                                            | 8.90E-13       | 2.30E-11         | 40            | 48.2          |
| BLUE<br>(Planktonic)                                           | 7.10E-08       | 5.90E-07         | 25            | 49            |
| RED (Biofilm)                                                  | 1.90E-05       | 1.70E-04         | 15            | 46.9          |

| <b>KEGG: Citrate<br/>cycle (TCA<br/>cycle)</b> | <b>P-Value</b> | <b>Benjamini</b> | <b>#genes</b> | <b>%genes</b> |
|------------------------------------------------|----------------|------------------|---------------|---------------|
| ALL                                            | 9.00E-13       | 1.50E-11         | 15            | 18.1          |
| BLUE<br>(Planktonic)                           | 1.00E-09       | 1.40E-08         | 11            | 21.6          |
| RED (Biofilm)                                  | 8.70E-03       | 2.10E-02         | 4             | 12.5          |

| <b>KEGG: 2-<br/>Oxocarboxylic<br/>acid<br/>metabolism</b> | <b>P-Value</b> | <b>Benjamini</b> | <b>#genes</b> | <b>%genes</b> |
|-----------------------------------------------------------|----------------|------------------|---------------|---------------|
| ALL                                                       | 2.80E-10       | 2.80E-09         | 13            | 15.7          |
| BLUE<br>(Planktonic)                                      | 4.00E-02       | 1.00E-01         | 4             | 7.8           |
| RED (Biofilm)                                             | 1.70E-09       | 3.20E-08         | 9             | 28.1          |

| <b>KEGG:<br/>Glyoxylate and<br/>dicarboxylate<br/>metabolism</b> | <b>P-Value</b> | <b>Benjamini</b> | <b>#genes</b> | <b>%genes</b> |
|------------------------------------------------------------------|----------------|------------------|---------------|---------------|
|------------------------------------------------------------------|----------------|------------------|---------------|---------------|



|                      |          |          |    |      |
|----------------------|----------|----------|----|------|
| ALL                  | 4.10E-09 | 2.60E-08 | 13 | 15.7 |
| BLUE<br>(Planktonic) | 1.10E-07 | 7.60E-07 | 10 | 19.6 |
| RED (Biofilm)        | 9.30E-02 | 1.90E-01 | 3  | 9.4  |

| <b>KEGG: Pyruvate<br/>metabolism</b> | <b>P-Value</b> | <b>Benjamini</b> | <b>#genes</b> | <b>%genes</b> |
|--------------------------------------|----------------|------------------|---------------|---------------|
| ALL                                  | 2.20E-08       | 1.20E-07         | 15            | 18.1          |
| BLUE<br>(Planktonic)                 | 7.50E-05       | 3.40E-04         | 9             | 17.6          |
| RED (Biofilm)                        | 1.10E-03       | 4.40E-03         | 6             | 18.8          |

| <b>KEGG:<br/>Propanoate<br/>metabolism</b> | <b>P-Value</b> | <b>Benjamini</b> | <b>#genes</b> | <b>%genes</b> |
|--------------------------------------------|----------------|------------------|---------------|---------------|
| ALL                                        | 5.50E-08       | 2.80E-07         | 11            | 13.3          |
| BLUE<br>(Planktonic)                       | 5.70E-05       | 2.90E-04         | 7             | 13.7          |
| RED (Biofilm)                              | 7.10E-03       | 2.00E-02         | 4             | 12.5          |

| <b>KEGG:<br/>Butanoate<br/>metabolism</b> | <b>P-Value</b> | <b>Benjamini</b> | <b>#genes</b> | <b>%genes</b> |
|-------------------------------------------|----------------|------------------|---------------|---------------|
| ALL                                       | 1.20E-07       | 5.20E-07         | 11            | 13.3          |
| BLUE<br>(Planktonic)                      | 8.90E-05       | 3.60E-04         | 7             | 13.7          |
| RED (Biofilm)                             | 8.70E-03       | 2.10E-02         | 4             | 12.5          |

**Supplementary Table 5.** Gene composition of three general enriched KEGG pathways in Cluster 1 is indicated by "x" symbol.

| <b>KEGG:<br/>Metabolic<br/>pathways</b> | <b>KEGG:<br/>synthesis<br/>of<br/>secondary<br/>metabolites</b> | <b>KEGG:<br/>synthesis<br/>of<br/>antibiotics</b> | <b>Functional annotation</b>                    | <b>Gene</b> |
|-----------------------------------------|-----------------------------------------------------------------|---------------------------------------------------|-------------------------------------------------|-------------|
| x                                       |                                                                 |                                                   | 1-Pyrroline-5-Carboxylate dehydrogenase         | BC0344      |
| x                                       |                                                                 |                                                   | 4-Aminobutyrate--2-Oxoglutarate transaminase    | BC0355      |
|                                         | x                                                               |                                                   | Glycerol-3-Phosphate dehydrogenase              | BC1036      |
| x                                       |                                                                 |                                                   | Succinate-Semialdehyde dehydrogenase [NADP+]    | BC0357      |
| x                                       | x                                                               | x                                                 | Fumarate hydratase                              | BC0466      |
| x                                       |                                                                 |                                                   | Formate acetyltransferase                       | BC0491      |
| x                                       |                                                                 |                                                   | formate dehydrogenasealpha chain                | BC0589      |
| x                                       |                                                                 |                                                   | aspartate ammonia-lyase                         | aspA        |
| x                                       | x                                                               | x                                                 | acetyltransferase                               | BC0849      |
| x                                       | x                                                               | x                                                 | ornithine--oxo-acid transaminase                | rocD        |
| x                                       | x                                                               | x                                                 | 2-oxoglutarate dehydrogenasesubunit E1          | sucA        |
| x                                       | x                                                               | x                                                 | branched-chain aminoacid aminotransferase       | BC1396      |
| x                                       | x                                                               | x                                                 | acetolactate synthasesmall subunit              | ilvH        |
| x                                       | x                                                               | x                                                 | ketol-acid reductoisomerase                     | BC1399      |
| x                                       | x                                                               |                                                   | 2-isopropylmalate synthase                      | BC1400      |
| x                                       | x                                                               |                                                   | 3-isopropylmalate dehydrogenase                 | BC1401      |
| x                                       | x                                                               |                                                   | 3-isopropylmalate dehydratase large subunit     | BC1402      |
| x                                       | x                                                               |                                                   | asparagine synthetaseAsnA                       | BC1746      |
| x                                       | x                                                               | x                                                 | branched-chain aminoacid aminotransferase       | BC1776      |
| x                                       | x                                                               | x                                                 | acetolactate synthase small subunit             | BC1777      |
| x                                       | x                                                               | x                                                 | alcohol dehydrogenase                           | BC2220      |
| x                                       | x                                                               | x                                                 | citrate synthase3                               | BC2285      |
| x                                       |                                                                 |                                                   | 3-hydroxyisobutyrate dehydrogenase              | BC2289      |
| x                                       |                                                                 |                                                   | methylmalonate-semialdehyde dehydrogenase       | acylating   |
| x                                       | x                                                               |                                                   | metal-dependent hydrolase                       | BC2758      |
| x                                       | x                                                               | x                                                 | dihydrolipoamide dehydrogenase                  | acoL        |
| x                                       | x                                                               | x                                                 | acetoin dehydrogenase E1 component beta-subunit | BC2778      |
| x                                       | x                                                               | x                                                 | malate:quinone oxidoreductase                   | BC2959      |
| x                                       | x                                                               | x                                                 | aldehyde dehydrogenase                          | BC3555      |
| x                                       | x                                                               | x                                                 | aconitate hydratase                             | BC3616      |
| x                                       | x                                                               |                                                   | imidazolonepropionase                           | BC3650      |
| x                                       | x                                                               |                                                   | urocanate hydratase                             | BC3651      |
| x                                       | x                                                               |                                                   | histidine ammonia-lyase                         | hutH        |
| x                                       | x                                                               | x                                                 | succinyl-CoA synthetasesubunit alpha            | BC3833      |
| x                                       |                                                                 | x                                                 | succinyl-CoA synthetasesubunit beta             | sucC        |
| x                                       |                                                                 | x                                                 | acetyl-CoA acetyltransferase                    | BC4023      |
| x                                       |                                                                 | x                                                 | glycine dehydrogenasesubunit 2                  | BC4224      |

|   |   |   |                                                |        |
|---|---|---|------------------------------------------------|--------|
| x | x | x | glycine dehydrogenase subunit 1                | BC4225 |
|   |   |   | glycine cleavage system aminomethyltransferase |        |
| x | x | x | T                                              | gcvT   |
|   |   |   | bifunctional acetaldehyde-                     |        |
| x | x | x | CoA/alcohol dehydrogenase                      | BC4365 |
| x | x | x | succinate dehydrogenase iron-sulfur subunit    | sdhB   |
| x | x | x | succinate dehydrogenase flavoprotein subunit   | sdhA   |
| x | x | x | malate dehydrogenase                           | BC4592 |
| x | x | x | isocitrate dehydrogenase                       | BC4593 |
| x | x | x | citrate synthase                               | BC4594 |
| x | x | x | acetyl-coenzyme A synthetase                   | BC4645 |
| x | x | x | phosphoenolpyruvate carboxykinase              | BC4762 |
| x | x | x | L-lactate dehydrogenase                        | ldh    |
| x | x | x | L-lactate dehydrogenase                        | ldh    |
| x |   | x | acetyl-CoA acetyltransferase                   | BC5003 |
| x | x |   | enoyl-CoA hydratase                            | BC5004 |
| x | x | x | Prolyne dehydrogenase                          | BC5006 |
| x |   | x | acetyl-CoA acetyltransferase                   | BC5344 |

**Supplementary Table 6.** Specialization of biofilm and floating cells in distinct but coordinated metabolic activities. Genes belonging to cluster 2.

| <b>GeneIDs</b> | <b>Planktonic(blue)/Biofilm(red)</b> | <b>DAVID functional annotation</b>                  |
|----------------|--------------------------------------|-----------------------------------------------------|
| BC0049         | red                                  | SspF protein                                        |
| BC0069         | red                                  | stage II sporulation protein E                      |
| BC0169         | red                                  | spore germination protein GerD                      |
| BC0170         | blue                                 | #N/A                                                |
| BC0263         | red                                  | #N/A                                                |
| BC0520         | blue                                 | #N/A                                                |
| BC0603         | red                                  | hypothetical protein                                |
| BC0875         | red                                  | small acid-soluble spore protein                    |
| BC0877         | red                                  | hypothetical protein                                |
| BC1012         | blue                                 | #N/A                                                |
| BC1225         | blue                                 | #N/A                                                |
| BC1500         | red                                  | hypothetical protein                                |
| BC1501         | red                                  | hypothetical protein                                |
| BC1502         | red                                  | hypothetical protein                                |
| BC1509         | red                                  | stage IV sporulation protein A                      |
| BC1520         | red                                  | #N/A                                                |
| BC1984         | red                                  | small acid-soluble spore protein                    |
| BC1994         | blue                                 | #N/A                                                |
| BC2010         | red                                  | #N/A                                                |
| BC2050         | red                                  | #N/A                                                |
| BC2095         | red                                  | hypothetical protein                                |
| BC2536         | red                                  | cell wall hydrolase cwIJ                            |
| BC3106         | red                                  | small acid-soluble spore protein                    |
| BC3605         | red                                  | #N/A                                                |
| BC3770         | red                                  | spore coat protein E                                |
| BC3783         | red                                  | #N/A                                                |
| BC3800         | red                                  | dipicolinate synthase subunit B                     |
| BC3801         | red                                  | dipicolinate synthase subunit A                     |
| BC3802         | red                                  | hypothetical protein                                |
| BC3902         | red                                  | hypothetical protein                                |
| BC3905         | red                                  | sporulation sigma-E factor processing<br>peptidase  |
| BC3922         | red                                  | prespore specific transcriptional<br>activator rsfA |
| BC4067         | red                                  | stage V sporulation protein AD                      |
| BC4073         | red                                  | anti-sigma F factor                                 |
| BC4088         | red                                  | hypothetical protein                                |
| BC4186         | red                                  | stage III sporulation protein AH                    |
| BC4187         | red                                  | stage III sporulation protein AG                    |
| BC4188         | red                                  | stage III sporulation protein AF                    |
| BC4191         | red                                  | stage III sporulation protein AC                    |
| BC4192         | red                                  | stage III sporulation protein SpoAB                 |
| BC4193         | red                                  | #N/A                                                |

|        |      |                                                     |
|--------|------|-----------------------------------------------------|
| BC4194 | red  | hypothetical protein                                |
| BC4288 | blue | membrane-attached cytochrome c550                   |
| BC4440 | red  | #N/A                                                |
| BC4466 | red  | CotS-related protein                                |
| BC4467 | red  | stage VI sporulation protein D                      |
| BC4495 | red  | germination protein germ                            |
| BC4563 | red  | small acid-soluble spore protein Sspl               |
| BC4577 | red  | hypothetical protein                                |
| BC4606 | red  | hypothetical protein                                |
| BC4640 | red  | hypothetical protein                                |
| BC4641 | red  | hypothetical protein                                |
| BC4642 | blue | inorganic polyphosphate/ATP-NAD<br>kinase           |
| BC4660 | blue | #N/A                                                |
| BC4662 | blue | #N/A                                                |
| BC4899 | red  | hypothetical protein                                |
| BC4923 | blue | #N/A                                                |
| BC4924 | blue | #N/A                                                |
| BC5145 | red  | hypothetical protein                                |
| BC5147 | red  | stage V sporulation protein AC                      |
| BC5148 | red  | stage V sporulation protein AD                      |
| BC5149 | red  | stage V sporulation protein AE                      |
| BC5282 | red  | stage III sporulation protein D                     |
| BC5283 | red  | stage II sporulation protein Q                      |
| BC5287 | red  | stage II sporulation protein D                      |
| BC5289 | red  | #N/A                                                |
| BC5385 | red  | prespore specific transcriptional<br>activator rsfA |
| BC5390 | red  | cell wall hydrolase cwIJ                            |
| BC5480 | red  | hypothetical protein                                |
| BC5391 | red  | hypothetical protein                                |
| BC4607 | red  | hypothetical protein                                |

**Supplementary Table 7.** Specialization of biofilm and floating cells in distinct but coordinated metabolic activities. Genes belonging to cluster 3.

| <b>GeneIDs</b> | <b>Planktonic(blue)/Biofilm(red)</b> | <b>DAVID functional annotation</b>                          |
|----------------|--------------------------------------|-------------------------------------------------------------|
| BC0114         | blue                                 | RNA polymerase factor sigma-70                              |
| BC0404         | blue                                 | methyl-accepting chemotaxis protein                         |
| BC0405         | blue                                 | #N/A                                                        |
| BC0422         | blue                                 | methyl-accepting chemotaxis protein                         |
| BC0559         | blue                                 | methyl-accepting chemotaxis protein                         |
| BC0576         | blue                                 | methyl-accepting chemotaxis protein                         |
| BC0678         | blue                                 | methyl-accepting chemotaxis protein                         |
| BC0679         | red                                  | #N/A                                                        |
| BC1625         | blue                                 | flagellar motor protein MotP                                |
| BC1626         | blue                                 | #N/A                                                        |
| BC1627         | blue                                 | chemotaxis protein CheY                                     |
| BC1628         | blue                                 | chemotaxis protein CheA                                     |
| BC1629         | blue                                 | flagellar motor switch protein                              |
| BC1630         | blue                                 | hypothetical protein                                        |
| BC1636         | blue                                 | flagellar hook-associated protein FlgK                      |
| BC1637         | blue                                 | flagellar hook-associated protein FlgL                      |
| BC1638         | blue                                 | flagellar capping protein                                   |
| BC1639         | blue                                 | flagellar protein fliS                                      |
| BC1643         | blue                                 | flagellar hook-basal body protein FliE                      |
| BC1644         | blue                                 | flagellar MS-ring protein                                   |
| BC1645         | blue                                 | flagellar motor switch protein G                            |
| BC1646         | blue                                 | flagellar assembly protein H                                |
| BC1647         | blue                                 | flagellum-specific ATP synthase                             |
| BC1651         | blue                                 | flagellar hook protein FlgE                                 |
| BC1653         | blue                                 | hypothetical protein                                        |
| BC1654         | blue                                 | chemotaxis protein CheV                                     |
| BC1657         | blue                                 | flagellin                                                   |
| BC1658         | blue                                 | flagellin                                                   |
| BC1659         | blue                                 | flagellin                                                   |
| BC1660         | blue                                 | soluble lytic murein transglycosylase                       |
| BC1662         | blue                                 | flagellar motor switch protein FliM                         |
| BC1664         | blue                                 | flagellar motor switch protein fliN                         |
| BC1671         | blue                                 | flagellar basal body rod protein FlgG                       |
| BC1672         | blue                                 | metal-dependent hydrolase related to alanyl-tRNA synthetase |
| BC2006         | blue                                 | methyl-accepting chemotaxis protein                         |
| BC2766         | blue                                 | #N/A                                                        |
| BC3903         | red                                  | sporulation sigma factor SigG                               |
| BC3904         | red                                  | sporulation sigma factor SigE                               |
| BC4071         | red                                  | Sodium/proline symporter                                    |
| BC4072         | red                                  | sporulation sigma factor SigF                               |
| BC4074         | red                                  | anti-sigma F factor antagonist                              |
| BC4512         | blue                                 | flagellar motor protein MotB                                |

|        |      |                                                     |
|--------|------|-----------------------------------------------------|
| BC4513 | blue | flagellar motor protein MotA                        |
| BC5009 | blue | methyl-accepting chemotaxis protein                 |
| BC5034 | blue | methyl-accepting chemotaxis protein                 |
| BC5065 | blue | #N/A                                                |
| BC5143 | blue | #N/A                                                |
| BC1631 | blue | hypothetical protein                                |
| BC1640 | blue | hypothetical protein                                |
| BC1648 | blue | cytoplasmic protein                                 |
| BC1652 | blue | hypothetical protein                                |
| BC5035 | red  | #N/A                                                |
| BC5066 | blue | endonuclease/exonuclease/phosphatase family protein |

**Supplementary Table 8.** Primers used to obtain mutants in *eps1* and *eps2*.

| <b>Mutation</b>         | <b>Name</b>        | <b>Sequence</b>                                                |
|-------------------------|--------------------|----------------------------------------------------------------|
| $\Delta$ BC_1583 – 1591 | Forward.up. BamHI  | AAAAGGATCCGGGATGTTGCATAAGTCGAAC                                |
|                         | Reverse.up         | ATTGGCATTAAATCCAGCAAGGCCACGAGCGATTAAAC CATTC                   |
|                         | Forward.down       | CCTTGCTGGATTAATGCCAAT                                          |
|                         | Reverse.down.NcoI  | AAAACCATGGCTCTTT TTCATTACCTATATCCCCTACTA                       |
| $\Delta$ BC_5279 - 5274 | Forward.up. BamHI  | AAAAGGATCCTTTGAAAGAATAAGGCTGACG                                |
|                         | Reverse.up         | TGGTTTTCTTTCTTTCTCCGAACATAT T                                  |
|                         | Forward.down       | AAACCATTACGACAATTAATTACACATCAGATGAGTCA AGA<br>GAGTATTAGGAAAACC |
|                         | Reverse.do wn.NcoI | AAAACCATGGATGCAAAGGTAACGTGATTCATT                              |
