# Supplementary material for: Biofilm formation displays intrinsic offensive and defensive features of Bacillus cereus
Source: PubMed Central journal article supplement (PMC6962202; doi:10.1038/s41522-019-0112-7), 2020-01-15
Supplement: 41522_2019_112_MOESM7_ESM.pdf [file 41522_2019_112_MOESM7_ESM.pdf]

Warning: This form is not supported with the current version of Acrobat or Adobe Reader.  
Upgrade to the latest version for full support.
